# Supplementary material for: Identification of Antibacterial Components in the Methanol-Phase Extract from Edible Herbaceous Plant Rumex madaio Makino and Their Antibacterial Action Modes
Source: MDPI journal article supplement (doi:10.3390/molecules27030660), 2022-01-20
Supplement: s1 [file s1]

**Table S1.** Bacterial strains and media used in this study.

| <b>Bacterial strain</b>                  | <b>Culture medium</b> | <b>Source</b>       |
|------------------------------------------|-----------------------|---------------------|
| <i>Vibrio alginolyticus</i> ATCC17749    | TSB                   | ATCC, United States |
| <i>Vibrio alginolyticus</i> ATCC33787    | TSB                   | ATCC, United States |
| <i>Vibrio fluvialis</i> ATCC33809        | Marine 2216           | ATCC, United States |
| <i>Vibrio harvey</i> ATCC BAA-1117       | Marine 2216           | ATCC, United States |
| <i>Vibrio harveyi</i> ATCC33842          | Marine 2216           | ATCC, United States |
| <i>Vibrio metschnikovii</i> ATCC700040   | Marine 2216           | ATCC, United States |
| <i>Vibrio mimicus</i> bio-56759          | TSB                   | Biobw, China        |
| <i>Vibrio parahaemolyticus</i> ATCC17802 | TSB                   | ATCC, United States |
| <i>Vibrio parahaemolyticus</i> ATCC33847 | TSB                   | ATCC, United States |
| <i>Vibrio vulnificus</i> ATCC27562       | TSB                   | Biobw, China        |
| <i>Aeromonas hydrophila</i> ATCC35654    | TSB                   | ATCC, United States |
| <i>Bacillus cereus</i> A1-1              | TSB                   | LS-SHOU, China      |
| <i>Enterobacter cloacae</i> ATCC13047    | TSB                   | Biobw, China        |
| <i>Enterobacter cloacae</i>              | LB                    | LS-SHOU, China      |
| <i>Escherichia coli</i> ATCC8739         | TSB                   | Biobw, China        |
| <i>Escherichia coli</i> K12              | TSB                   | IIM, China          |
| <i>Escherichia coli</i> ATCC25922        | LB                    | ATCC, United States |
| <i>Enterobacter sakazakii</i> CMCC45401  | TSB                   | Biobw, China        |
| <i>Listeria monocytogenes</i> ATCC19115  | BHI                   | Biobw, China        |
| <i>Pseudomonas aeruginosa</i> ATCC9027   | TSB                   | Biobw, China        |
| <i>Pseudomonas aeruginosa</i> ATCC27853  | TSB                   | Biobw, China        |
| <i>Staphylococcus aureus</i> ATCC25923   | TSB                   | ATCC, United States |
| <i>Staphylococcus aureus</i> ATCC8095    | TSB                   | ATCC, United States |
| <i>Staphylococcus aureus</i> ATCC29213   | TSB                   | ATCC, United States |
| <i>Staphylococcus aureus</i> ATCC6538    | TSB                   | ATCC, United States |
| <i>Staphylococcus aureus</i> ATCC6538P   | TSB                   | ATCC, United States |
| <i>Staphylococcus aureus</i>             | TSB                   | LS-SHOU, China      |
| <i>Shigella dysenteriae</i> CMCC51252    | TSB                   | GCCC, China         |
| <i>Salmonella choleraesuis</i> ATCC13312 | TSB                   | ATCC, United States |
| <i>Shigella flexneri</i> CMCC51572       | TSB                   | GCCC, China         |
| <i>Shigella flexneri</i> ATCC12022       | TSB                   | ATCC, United States |
| <i>Shigella flexneri</i> CMCC51574       | TSB                   | GCCC, China         |
| <i>Salmonella paratyphi-A</i> CMCC50093  | TSB                   | GCCC, China         |
| <i>Shigella sonnei</i> ATCC25931         | TSB                   | ATCC, United States |
| <i>Shigella sonnet</i> CMCC51592         | TSB                   | GCCC, China         |
| <i>Salmonella typhimurium</i> ATCC15611  | TSB                   | ATCC, United States |
| <i>Salmonella</i>                        | LB                    | LS-SHOU, China      |
| <i>Vibrio parahaemolyticus</i> B3-13     | TSB                   | LS-SHOU, China      |
| <i>Vibrio parahaemolyticus</i> B4-10     | TSB                   | LS-SHOU, China      |
| <i>Vibrio parahaemolyticus</i> B5-29     | TSB                   | LS-SHOU, China      |
| <i>Vibrio parahaemolyticus</i> B9-35     | TSB                   | LS-SHOU, China      |
| <i>Vibrio cholerae</i> GIM1.449          | TSB                   | GCCC, China         |
| <i>Vibrio cholerae</i> Q10-54            | TSB                   | LS-SHOU, China      |
| <i>Vibrio cholerae</i> b10-49            | TSB                   | LS-SHOU, China      |

ATCC: American Type Culture Collection, United States; GCCC, Guangdong Culture Collection Center, Guangzhou, China; IIM, Institute of Industrial Microbiology, Shanghai, China; LS-SHOU, Laboratory stock, Shanghai Ocean University, Shanghai, China.

**Table S2.** Expression of representative DEGs by RT-qPCR assay.

| Sample                                  | Gene               | Predicted protein                                                | Fold change |         |
|-----------------------------------------|--------------------|------------------------------------------------------------------|-------------|---------|
|                                         |                    |                                                                  | RNA-Seq.    | RT-PCR  |
| <i>V. alginolyticus</i><br>ATCC17749    | <i>N646_0236</i>   | Hydroxylamine reductase                                          | 87.807      | 32.334  |
|                                         | <i>N646_0310</i>   | Histidine ammonia-lyase                                          | 3.187       | 2.121   |
|                                         | <i>N646_2909</i>   | Cation transport ATPase%2C E1-E2 family protein                  | 0.123       | 0.142   |
|                                         | <i>N646_4052</i>   | Putative acyl-CoA thiolase                                       | 5.154       | 1.288   |
|                                         | <i>N646_4487</i>   | Arginine ABC transporter%2C periplasmic arginine-binding protein | 4.958       | 7.863   |
| <i>V. parahaemolyticus</i><br>ATCC17802 | <i>VP_RS01760</i>  | Dihydroxyacetone kinase ADP-binding subunit DhaL                 | 0.040       | 0.111   |
|                                         | <i>VP_RS01755</i>  | Dihydroxyacetone kinase subunit DhaK                             | 0.067       | 0.158   |
|                                         | <i>VP_RS05780</i>  | Hydroxylamine reductase                                          | 107.754     | 26.816  |
|                                         | <i>VP_RS09370</i>  | Ammonia-forming nitrite reductase cytochrome c552 subunit        | 19.809      | 4.141   |
|                                         | <i>VP_RS10480</i>  | Type I glyceraldehyde-3-phosphate dehydrogenase                  | 0.168       | 0.011   |
|                                         | <i>VP_RS10820</i>  | Chemotaxis protein CheA                                          | 0.386       | 0.498   |
|                                         | <i>VP_RS16540</i>  | Flagellar basal body rod protein FlgB                            | 0.064       | 0.667   |
|                                         | <i>VP_RS22540</i>  | Flagellar biosynthesis protein FliQ                              | 0.055       | 0.516   |
|                                         | <i>VP_RS22500</i>  | Flagellar motor switch protein FliG                              | 0.294       | 0.629   |
|                                         | <i>VP_RS23260</i>  | 6-phospho-beta-glucosidase                                       | 0.087       | 0.049   |
| <i>V. parahaemolyticus</i><br>B4-10     | <i>VP_RS05780</i>  | Hydroxylamine reductase                                          | 107.754     | 10.740  |
|                                         | <i>VP_RS06180</i>  | Histidine ammonia-lyase                                          | 6.284       | 1.860   |
|                                         | <i>VP_RS06185</i>  | Urocanate hydratase                                              | 10.231      | 22.860  |
|                                         | <i>VP_RS06190</i>  | Formimidoylglutamase                                             | 5.106       | 9.420   |
|                                         | <i>VP_RS06195</i>  | Imidazolonepropionase                                            | 6.998       | 6.770   |
|                                         | <i>VP_RS06485</i>  | ABC transporter ATP-binding protein                              | 0.310       | 0.040   |
|                                         | <i>VP_RS06520</i>  | ATP-binding cassette domain-containing protein                   | 0.256       | 0.070   |
|                                         | <i>VP_RS06525</i>  | ABC transporter permease subunit                                 | 0.265       | 0.130   |
|                                         | <i>VP_RS20250</i>  | BC transporter permease                                          | 10.250      | 3.780   |
|                                         | <i>VP_RS20670</i>  | ABC transporter ATP-binding protein                              | 0.3698      | 0.018   |
|                                         | <i>VP_RS20695</i>  | ABC transporter ATP-binding protein                              | 0.455       | 0.022   |
| <i>B. cereus</i> A1-1                   | <i>BCN_RS06525</i> | Indole-3-glycerol phosphate synthase TrpC                        | 0.235       | 0.062   |
|                                         | <i>BCN_RS08605</i> | Flagellin                                                        | 0.045       | 0.038   |
|                                         | <i>BCN_RS08640</i> | Flagellar type III secretion system pore protein FliP            | 0.108       | 0.557   |
|                                         | <i>BCN_RS10010</i> | Methyl-accepting chemotaxis protein                              | 0.063       | 0.235   |
|                                         | <i>BCN_RS10875</i> | Hydroxylamine reductase                                          | 15.156      | 1.693   |
|                                         | <i>BCN_RS16540</i> | Respiratory nitrate reductase subunit gamma                      | 150.78      | 233.631 |
